# Supplementary material for: Architectures and accuracy of artificial neural network for disease classification from omics data
Source: Springer Nature journal article supplement (doi:10.1186/s12864-019-5546-z), 2019-03-04
Supplement: MOESM1 [file 12864_2019_5546_MOESM1_ESM.pdf]

# Architectures and accuracy of artificial neural network for disease classification from omics data

Hui Yu<sup>1</sup>, David C. Samuels<sup>2</sup>, Ying-yong Zhao<sup>3</sup>, Yan Guo<sup>1,§</sup>

§ correspondence: yaguo@salud.unm.edu

## **Additional file 1**

File name: Additional file 1.pdf

Title of data: Supplementary text, table, and figures to the manuscript.

Description of data: Here we included Table S1, Table S2 (explanation to Cohen's Kappa), and Figures S1 & S2 cited in the manuscript.

**Table S1. The code and a brief description of 11 variants of MLP/CNN models surveyed in this work.** The top six structures are primary ones used for making initial observations; the bottom five ones are extended structures used to verify initial speculations. Unless explicitly denied, all networks contained a dropout layer immediately prior to the output layer with a dropping rate of 0.5. The same code nomenclature was applied to both MLP and CNN models, although in CNN a hidden layer is actually a convolution layer and a unit is more often termed a kernel.

| <b>Simple code</b> | <b>Full code</b>       | <b>Architecture</b>                              |
|--------------------|------------------------|--------------------------------------------------|
| 1L_16U             | 1L_16U                 | The basic structure as depicted in Figure 1.     |
| 1L_32U             | 1L_32U                 | Use 32 nodes on the first hidden layer.          |
| 1L_64U             | 1L_64U                 | Use 64 nodes on the first hidden layer.          |
| 1L_128U            | 1L_128U                | Use 128 nodes on the first hidden layer.         |
| 2L1_32U            | 2L_16U_32U             | Two hidden layers with 16/32 units.              |
| 3L1_64U            | 3L_16U_32U_64U         | Three hidden layers with 16/32/64 units.         |
| 1L_16U_noDrop      | 1L_16U_noDrop          | Same as 1L_16U except lacking the dropout layer  |
| 1L_32U_noDrop      | 1L_32U_noDrop          | Same as 1L_32U except lacking the dropout layer  |
| 1L_64U_noDrop      | 1L_64U_noDrop          | Same as 1L_64U except lacking the dropout layer  |
| 1L_128U_noDrop     | 1L_128U_noDrop         | Same as 1L_128U except lacking the dropout layer |
| 2L1_32U_noDrop     | 2L_16U_32U_noDrop      | Same as 1L_32U except lacking the dropout layer  |
| 3L1_64U_noDrop     | 3L_16U_32U_64U_noDrop  | Same as 1L_64U except lacking the dropout layer  |
| 2L1_64U            | 2L_16U_64U             | Two hidden layers with 16/64 units.              |
| 2L1_128U           | 2L_16U_128U            | Two hidden layers with 16/128 units.             |
| 2L_128U            | 2L_128U_128U           | Two hidden layers with 128/128 units.            |
| 3L_128U            | 3L_128U_128U_128U      | Three hidden layers with 128/128/128 units.      |
| 4L_128U            | 4L_128U_128U_128U_128U | Four hidden layers with 128/128/128/128 units.   |

**Cohen's Kappa statistic** (Cohen, 1960) is a very useful but under-utilized metric that has a special advantage for machine learning cases involving multiple classes and/or imbalanced class distribution. Suppose it is a  $k$ -class problem, where the a priori class distribution is represented in a frequency vector  $(p_1, p_2, \dots, p_i, \dots, p_k)$ , and the predicted class distribution appears as  $(q_1, q_2, \dots, q_i, \dots, q_k)$ . For instance, in a three-class classification setting (Table S1), the actual class frequencies are  $(p_1, p_2, p_3)$ , and the predicted class frequencies are  $(q_1, q_2, q_3)$ , where  $p_i = (n_{i1} + n_{i2} + n_{i3})/N$  and  $q_i = (n_{1i} + n_{2i} + n_{3i})/N$  with  $N = n_{11} + n_{12} + n_{13} + n_{21} + n_{22} + n_{23} + n_{31} + n_{32} + n_{33}$ . The Kappa statistics is defined as  $(ACC - expACC)/(1 - expACC)$ , where  $expACC = \sum(p_i * q_i)$  and ACC is Accuracy defined above. With regards to Table S1,  $expACC = p_1 \cdot q_1 + p_2 \cdot q_2 + p_3 \cdot q_3$  and  $ACC = (n_{11} + n_{22} + n_{33})/N$ . Note that this definition of expected accuracy ( $expACC$ ) is a more realistic approximation of random guess accuracy, which is equal to or larger than the class-distribution-agnostic baseline  $(1/k)$ .

**Table S2 Setting-up for Kappa calculation in a conceptual three-class classification problem.**

|                           |      | Predicted membership |          |          | Actual class frequency |
|---------------------------|------|----------------------|----------|----------|------------------------|
|                           |      | $C1'$                | $C2'$    | $C3'$    |                        |
| Actual membership         | $C1$ | $n_{11}$             | $n_{12}$ | $n_{13}$ | $p_1$                  |
|                           | $C2$ | $n_{21}$             | $n_{22}$ | $n_{23}$ | $p_2$                  |
|                           | $C3$ | $n_{31}$             | $n_{32}$ | $n_{33}$ | $p_3$                  |
| Predicted Class frequency |      | $q_1$                | $q_2$    | $q_3$    | N/A                    |



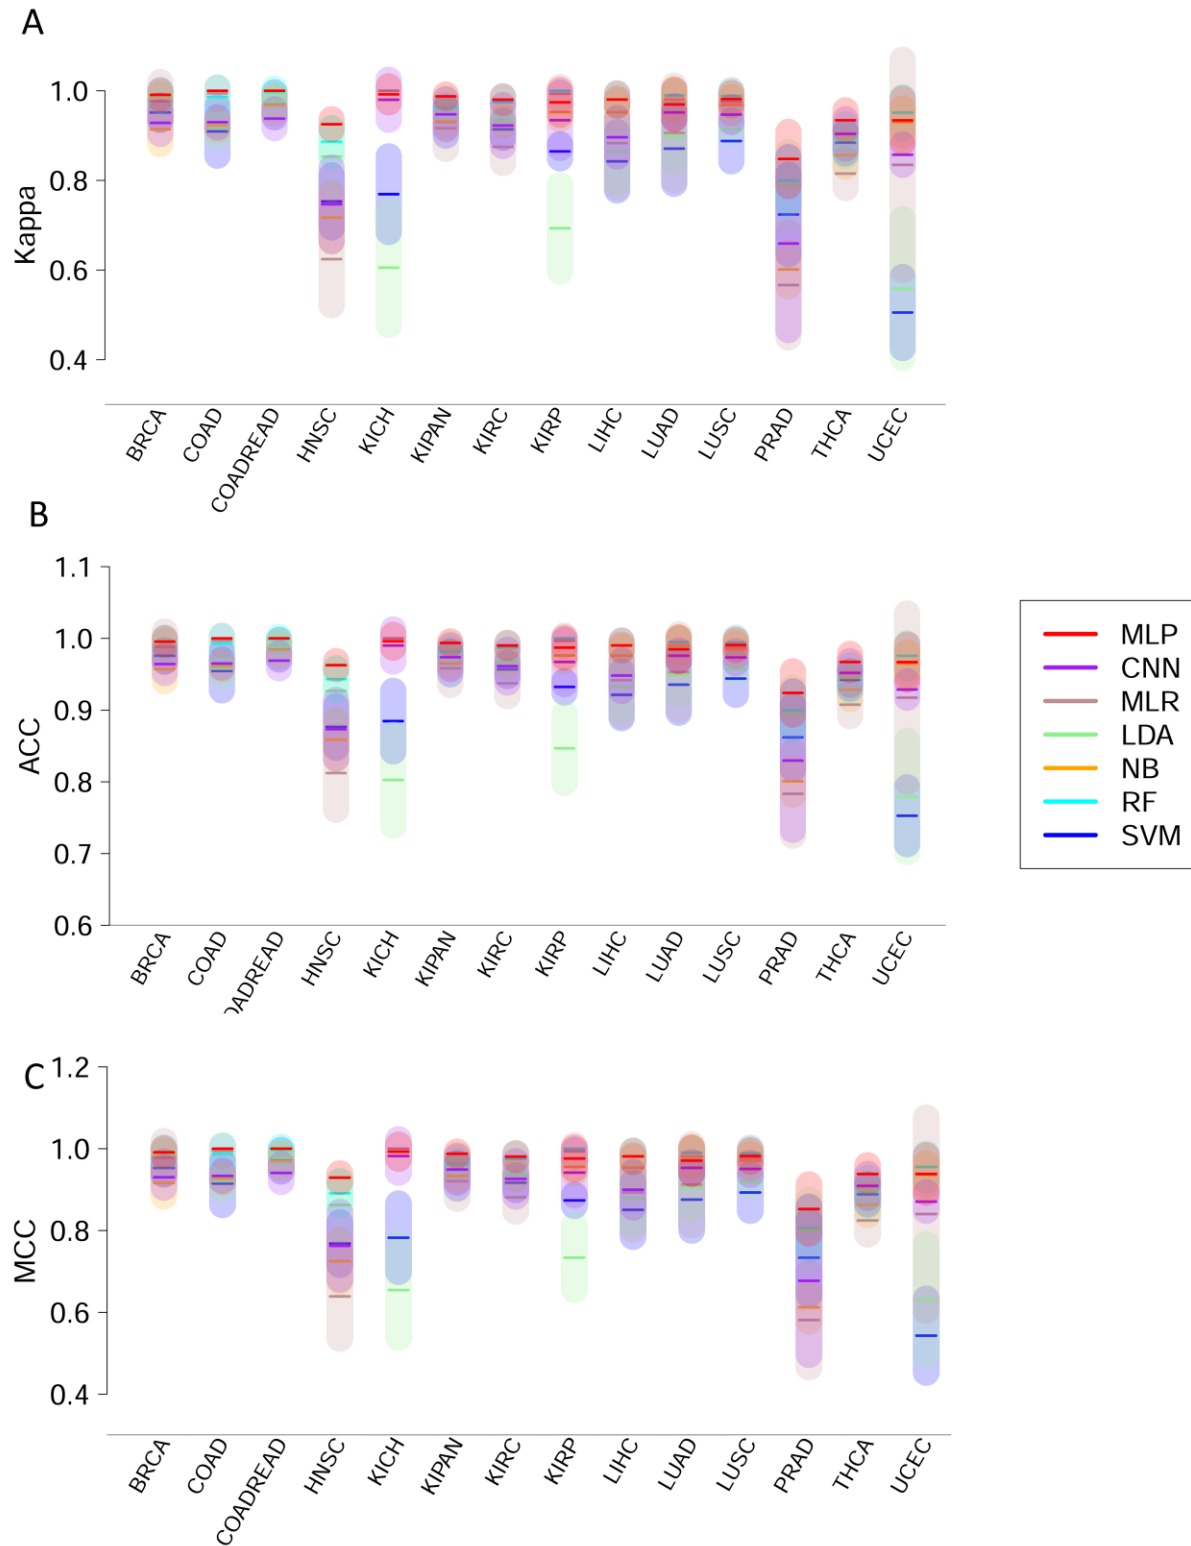

**Figure S2. Performance of MLP, CNN, and five state-of-the-art machine learning models in classifying tumor and normal samples of 14 TCGA cancers.** At each cancer, the performance of each method is shown with a mean level and a standard deviation interval, which result from five repetitive datasets. A, Cohen's Kappa. B, Accuracy. C, Matthew's Correlation Coefficient.
